# Supplementary material for: Bibliometric analysis of genetic counseling publications in Asia: Insights and implications
Source: PubMed Central journal article supplement — Genet Med Open. 2024 Jun 26;2(Suppl 2):101861. doi: 10.1016/j.gimo.2024.101861 (PMC11658555; doi:10.1016/j.gimo.2024.101861), 2024-06-26
Supplement: mmc1.pdf [file mmc1.pdf]

**Supplemental Table 1.** Search string used in the Scopus database search

```
TITLE ( "genetic counsel*" OR "genomic  
counsel*" ) AND PUBYEAR > 1951 AND PUBYEAR < 2024 AND ( LIMIT-  
TO ( LANGUAGE , "English" ) ) AND ( LIMIT-  
TO ( AFFILCOUNTRY , "India" ) OR LIMIT-  
TO ( AFFILCOUNTRY , "China" ) OR LIMIT-  
TO ( AFFILCOUNTRY , "Israel" ) OR LIMIT-  
TO ( AFFILCOUNTRY , "Japan" ) OR LIMIT-  
TO ( AFFILCOUNTRY , "Turkey" ) OR LIMIT-  
TO ( AFFILCOUNTRY , "Taiwan" ) OR LIMIT-TO ( AFFILCOUNTRY , "Hong  
Kong" ) OR LIMIT-TO ( AFFILCOUNTRY , "South Korea" ) OR LIMIT-  
TO ( AFFILCOUNTRY , "Philippines" ) OR LIMIT-  
TO ( AFFILCOUNTRY , "Iran" ) OR LIMIT-TO ( AFFILCOUNTRY , "Saudi  
Arabia" ) OR LIMIT-TO ( AFFILCOUNTRY , "Malaysia" ) OR LIMIT-  
TO ( AFFILCOUNTRY , "Indonesia" ) OR LIMIT-  
TO ( AFFILCOUNTRY , "Singapore" ) OR LIMIT-  
TO ( AFFILCOUNTRY , "Thailand" ) OR LIMIT-TO ( AFFILCOUNTRY , "Russian  
Federation" ) OR LIMIT-TO ( AFFILCOUNTRY , "Qatar" ) OR LIMIT-  
TO ( AFFILCOUNTRY , "Pakistan" ) OR LIMIT-TO ( AFFILCOUNTRY , "United Arab  
Emirates" ) OR LIMIT-TO ( AFFILCOUNTRY , "Bangladesh" ) OR LIMIT-  
TO ( AFFILCOUNTRY , "Oman" ) OR LIMIT-  
TO ( AFFILCOUNTRY , "Lebanon" ) OR LIMIT-  
TO ( AFFILCOUNTRY , "Jordan" ) OR LIMIT-  
TO ( AFFILCOUNTRY , "Georgia" ) OR LIMIT-TO ( AFFILCOUNTRY , "Viet  
Nam" ) OR LIMIT-TO ( AFFILCOUNTRY , "Sri Lanka" ) OR LIMIT-  
TO ( AFFILCOUNTRY , "Kuwait" ) OR LIMIT-  
TO ( AFFILCOUNTRY , "Iraq" ) OR LIMIT-  
TO ( AFFILCOUNTRY , "Bahrain" ) ) AND ( EXCLUDE ( DOCTYPE , "er" ) )
```
